# Supplementary material for: Biogeographic barriers drive co-diversification within associated eukaryotes of the Sarracenia alata pitcher plant system
Source: PeerJ. 2016 Jan 14;4:e1576. doi: 10.7717/peerj.1576 (PMC4715430; doi:10.7717/peerj.1576)
Supplement: Supplemental Information 1 — Excel file containing BLAST-n results from all sampled populations. [file peerj-04-1576-s001.xlsx]

## Sheet: A
OTU	Sequences	GenBank_identifier	E-value	Percent_Identity	Taxonomy
OTU_A_11	7	KP192855	1.4821e-140	100	Eukaryota	Fungi	Dikarya	Ascomycota	Pezizomycotina	Sordariomycetes	Sordariomycetes incertae sedis	Trichosphaeriales	Trichosphaeriaceae	Nigrospora
OTU_A_16	1	HQ634655	8.91997e-138	99.63	Eukaryota	Fungi	Dikarya	Ascomycota	Pezizomycotina	Eurotiomycetes	Chaetothyriomycetidae	Chaetothyriales	unclassified Chaetothyriales
OTU_A_19	2	JQ403623	2.48009e-138	99.64	Eukaryota	Fungi	Dikarya	Ascomycota	Pezizomycotina	Dothideomycetes	Pleosporomycetidae	Pleosporales	Pleosporineae	Pleosporaceae	Alternaria
OTU_A_21	4	KR873276	1.4821e-140	100	Eukaryota	Fungi	Dikarya	Ascomycota	Pezizomycotina	Sordariomycetes	Xylariomycetidae	Xylariales	Amphisphaeriaceae	Pestalotiopsis
OTU_A_22	1	KJ130983	4.26918e-116	94.91	Eukaryota	Fungi	Dikarya	Ascomycota	Pezizomycotina	Sordariomycetes	Hypocreomycetidae	Hypocreales	Cordycipitaceae	Simplicillium
OTU_A_23	1	AB378534	2.48009e-138	99.64	Eukaryota	Fungi	Dikarya	Ascomycota	Pezizomycotina	Sordariomycetes	Hypocreomycetidae	Hypocreales	Cordycipitaceae	Simplicillium
OTU_A_27	1	EF413604	2.49769e-133	98.55	Eukaryota	Fungi	Dikarya	Ascomycota	Pezizomycotina	Eurotiomycetes	Chaetothyriomycetidae	Chaetothyriales	Herpotrichiellaceae	Capronia
OTU_A_30	3	KP122800	2.48009e-138	99.64	Eukaryota	Fungi	Dikarya	Ascomycota	Pezizomycotina	Sordariomycetes	Hypocreomycetidae	Hypocreales	Nectriaceae	Fusarium	Fusarium fujikuroi species complex
OTU_A_39	2	AF033439	8.91997e-138	99.63	Eukaryota	Fungi	Dikarya	Ascomycota	Pezizomycotina	Eurotiomycetes	Eurotiomycetidae	Eurotiales	Aspergillaceae	Penicillium
OTU_A_45	1	KC455262	7.04348e-124	96.72	Eukaryota	Fungi	Dikarya	Ascomycota	Pezizomycotina	Eurotiomycetes	Chaetothyriomycetidae	Chaetothyriales	Cyphellophoraceae	Cyphellophora
OTU_A_2	331	KM246049	1.4821e-140	100	Eukaryota	Fungi	Dikarya	Ascomycota	Saccharomycotina	Saccharomycetes	Saccharomycetales	Debaryomycetaceae	Candida glaebosa clade
OTU_A_28	2	KF906511	4.23908e-121	95.7	Eukaryota	Fungi	Dikarya	Ascomycota	Saccharomycotina	Saccharomycetes	Saccharomycetales	Debaryomycetaceae	Candida/Lodderomyces clade	Lodderomyces
OTU_A_42	28	KM246049	4.17952e-131	98.18	Eukaryota	Fungi	Dikarya	Ascomycota	Saccharomycotina	Saccharomycetes	Saccharomycetales	Debaryomycetaceae	Candida glaebosa clade
OTU_A_40	1	JF773599	1.4821e-140	100	Eukaryota	Fungi	Dikarya	Ascomycota
OTU_A_18	1	KM555210	7.04348e-124	97.03	Eukaryota	Fungi	Dikarya	Basidiomycota	Agaricomycotina	Tremellomycetes	Tremellales	Tremellales incertae sedis	Trichosporon
OTU_A_24	3	JN939448	6.89556e-139	99.64	Eukaryota	Fungi	Dikarya	Basidiomycota	Agaricomycotina	Tremellomycetes	Tremellales	Tremellales incertae sedis	Trichosporon
OTU_A_35	1	JN649352	1.4821e-140	100	Eukaryota	Fungi	Dikarya	Basidiomycota	Agaricomycotina	Agaricomycetes	Corticiales	Corticiaceae	Phlebia
OTU_A_44	3	KJ936991	1.15387e-136	99.27	Eukaryota	Fungi	Dikarya	Basidiomycota	Agaricomycotina	Agaricomycetes	Agaricomycetidae	Agaricales	Tricholomataceae	Tricholoma
OTU_A_48	1	KM267736	1.49263e-135	98.91	Eukaryota	Fungi	Dikarya	Basidiomycota	Agaricomycotina	Agaricomycetes	Auriculariales	Auriculariaceae	Auricularia
OTU_A_50	1	JQ768872	2.53328e-123	96.36	Eukaryota	Fungi	Dikarya	Basidiomycota	Agaricomycotina	Tremellomycetes	Tremellales	Tremellales incertae sedis	Cryptococcus
OTU_A_51	1	KF691613	1.49263e-135	98.91	Eukaryota	Fungi	Dikarya	Basidiomycota	Agaricomycotina	Agaricomycetes	Corticiales	Corticiaceae	Dentocorticium
OTU_A_53	1	EU232298	1.15387e-136	99.27	Eukaryota	Fungi	Dikarya	Basidiomycota	Agaricomycotina	Agaricomycetes	Polyporales	Polyporaceae	Fibroporia
OTU_A_38	1	AY745717	2.04326e-94	89.96	Eukaryota	Fungi	Dikarya	Basidiomycota	Pucciniomycotina	Agaricostilbomycetes	Agaricostilbomycetes incertae sedis	mitosporic Agaricostilbomycetidae	Sporobolomyces
OTU_A_46	1	KM555204	3.20819e-137	99.27	Eukaryota	Fungi	Dikarya	Basidiomycota	Ustilaginomycotina	Ustilaginomycetes	Ustilaginales	Ustilaginaceae	mitosporic Ustilaginaceae	Pseudozyma
OTU_A_8	68	KM056329	1.4821e-140	100	Eukaryota	Fungi	Fungi incertae sedis	Mucoromycotina	Mucorales	Mucorineae	Mucoraceae	Mucor
OTU_A_33	1	JN206525	1.49263e-135	98.92	Eukaryota	Fungi	Fungi incertae sedis	Mucoromycotina	Mucorales	Mucorineae	Backusellaceae	Backusella
OTU_A_43	1	JN206497	9.04708e-128	97.12	Eukaryota	Fungi	Fungi incertae sedis	Mucoromycotina	Mucorales	Mucorineae	Mucoraceae	Mucor
OTU_A_47	1	KM242293	6.99382e-129	97.46	Eukaryota	Fungi	Fungi incertae sedis	Mucoromycotina	Mucorales	Mucorineae	Mucoraceae	Mucor
OTU_A_13	15	JQ311373	6.89556e-139	99.64	Eukaryota	Fungi	environmental samples
OTU_A_17	5	KF568245	1.49263e-135	98.91	Eukaryota	Fungi	environmental samples
OTU_A_20	2	KF565450	1.4821e-140	100	Eukaryota	Fungi	environmental samples
OTU_A_41	1	KF567809	2.49769e-133	98.55	Eukaryota	Fungi	environmental samples
OTU_A_52	1	KF568247	1.4821e-140	100	Eukaryota	Fungi	environmental samples
OTU_A_4	75	KF436392	5.36844e-135	98.91	Eukaryota	Fungi
OTU_A_1	198	JQ000370	1.52464e-120	95.64	Eukaryota	Metazoa	Ecdysozoa	Arthropoda	Chelicerata	Arachnida	Acari	Acariformes	Sarcoptiformes	Astigmata	Histiostomatoidea	Histiostomatidae	Anoetus
OTU_A_5	39	JQ000359	1.94454e-129	97.45	Eukaryota	Metazoa	Ecdysozoa	Arthropoda	Chelicerata	Arachnida	Acari	Acariformes	Sarcoptiformes	Astigmata	Histiostomatoidea	Histiostomatidae	Ovanoetus
OTU_A_10	8	JQ000343	1.95835e-124	96.39	Eukaryota	Metazoa	Ecdysozoa	Arthropoda	Chelicerata	Arachnida	Acari	Acariformes	Sarcoptiformes	Oribatida	Enarthronota	Brachychthonioidea	Brachychthoniidae	unclassified Brachychthoniidae
OTU_A_34	1	JQ000370	3.32371e-112	94.18	Eukaryota	Metazoa	Ecdysozoa	Arthropoda	Chelicerata	Arachnida	Acari	Acariformes	Sarcoptiformes	Astigmata	Histiostomatoidea	Histiostomatidae	Anoetus
OTU_A_37	1	JQ000370	5.56174e-110	93.8	Eukaryota	Metazoa	Ecdysozoa	Arthropoda	Chelicerata	Arachnida	Acari	Acariformes	Sarcoptiformes	Astigmata	Histiostomatoidea	Histiostomatidae	Anoetus
OTU_A_3	36	EU392316	1.4821e-140	100	Eukaryota	Metazoa	Ecdysozoa	Arthropoda	Hexapoda	Insecta	Pterygota	Neoptera	Endopterygota	Coleoptera	Polyphaga	Cucujiformia	Coccinellidae	Coccinellinae	Coccinellini	Coccinella
OTU_A_6	18	JF439579	6.89556e-139	99.64	Eukaryota	Metazoa	Ecdysozoa	Arthropoda	Hexapoda	Insecta	Pterygota	Neoptera	Endopterygota	Diptera	Brachycera	Muscomorpha	Oestroidea	Calliphoridae	Rhiniinae	Isomyia
OTU_A_15	1	EU392316	3.25391e-127	97.45	Eukaryota	Metazoa	Ecdysozoa	Arthropoda	Hexapoda	Insecta	Pterygota	Neoptera	Endopterygota	Coleoptera	Polyphaga	Cucujiformia	Coccinellidae	Coccinellinae	Coccinellini	Coccinella
OTU_A_36	1	KJ860019	1.4821e-140	100	Eukaryota	Metazoa	Ecdysozoa	Arthropoda	Hexapoda	Insecta	Pterygota	Neoptera	Endopterygota	Hymenoptera	Apocrita	Aculeata	Vespoidea	Formicidae	Myrmicinae	Stenamma
OTU_A_12	40	DQ145650	7.72198e-59	83.65	Eukaryota	Metazoa	Ecdysozoa	Nematoda
OTU_A_25	1	DQ145650	7.83201e-49	81.41	Eukaryota	Metazoa	Ecdysozoa	Nematoda
OTU_A_14	4	KJ877269	6.3619e-15	93.55	Eukaryota	Metazoa	Ecdysozoa	Nematoda	Chromadorea	Diplogasterida	Diplogasteridae	Teratodiplogaster
OTU_A_9	3	FJ654281	1.5139e-125	96.73	Eukaryota	Rhizaria	Cercozoa
OTU_A_7	34	AJ584697	4.81477e-31	76.9	Eukaryota	Amoebozoa	Mycetozoa	Myxogastria	Myxogastromycetidae	Physariida	Physaraceae	Fuligo
OTU_A_26	2	JQ519384	6.89556e-139	99.64	Eukaryota	Viridiplantae	Streptophyta	Embryophyta	Tracheophyta	Spermatophyta	Magnoliophyta	eudicotyledons	Gunneridae	Pentapetalae	asterids	Ericales	Sarraceniaceae	Sarracenia
OTU_A_29	1	NR_076660	1.64803e-65	83.7	Bacteria	Bacteroidetes	Sphingobacteriia	Sphingobacteriales	Sphingobacteriaceae	Pedobacter
OTU_A_31	1	NR_076660	9.91859e-63	83.15	Bacteria	Bacteroidetes	Sphingobacteriia	Sphingobacteriales	Sphingobacteriaceae	Pedobacter
OTU_A_32	1	NR_076660	9.98901e-58	82.08	Bacteria	Bacteroidetes	Sphingobacteriia	Sphingobacteriales	Sphingobacteriaceae	Pedobacter
OTU_A_49	1	CP010050	1.52464e-120	96.96	Bacteria	Firmicutes	Bacilli	Lactobacillales	Streptococcaceae	Lactococcus

## Sheet: C
OTU	Sequences	GenBank_identifier	E-value	Percent_Identity	Taxonomy
OTU_C_38	1	JQ622099	9.11131e-123	97.01	Eukaryota	Fungi	Dikarya	Ascomycota	Pezizomycotina	Dothideomycetes	Dothideomycetidae	Capnodiales	Dissoconiaceae	Ramichloridium
OTU_C_39	1	AB986419	1.48262e-140	100	Eukaryota	Fungi	Dikarya	Ascomycota	Pezizomycotina	Eurotiomycetes	Chaetothyriomycetidae	Chaetothyriales	Herpotrichiellaceae	Cladophialophora
OTU_C_40	1	HG421426	4.15152e-136	99.27	Eukaryota	Fungi	Dikarya	Ascomycota	Pezizomycotina	Dothideomycetes	Dothideomycetidae	Dothideales	Aureobasidiaceae	Aureobasidium
OTU_C_1	317	KM246049	1.4821e-140	100	Eukaryota	Fungi	Dikarya	Ascomycota	Saccharomycotina	Saccharomycetes	Saccharomycetales	Debaryomycetaceae	Candida glaebosa clade
OTU_C_29	1	EF463105	3.20932e-137	100	Eukaryota	Fungi	Dikarya	Ascomycota	Saccharomycotina	Saccharomycetes	Saccharomycetales	Saccharomycetaceae	Lachancea
OTU_C_31	1	KM246049	5.44685e-125	97.09	Eukaryota	Fungi	Dikarya	Ascomycota	Saccharomycotina	Saccharomycetes	Saccharomycetales	Debaryomycetaceae	Candida glaebosa clade
OTU_C_36	1	KM246049	1.17031e-126	97.45	Eukaryota	Fungi	Dikarya	Ascomycota	Saccharomycotina	Saccharomycetes	Saccharomycetales	Debaryomycetaceae	Candida glaebosa clade
OTU_C_17	4	KP322771	6.89798e-139	99.64	Eukaryota	Fungi	Dikarya	Ascomycota
OTU_C_25	1	EU490092	9.04708e-128	97.44	Eukaryota	Fungi	Dikarya	Ascomycota	environmental samples
OTU_C_20	4	KP013050	3.25505e-127	97.09	Eukaryota	Fungi	Dikarya	Basidiomycota	Agaricomycotina	Agaricomycetes	Polyporales	Polyporaceae
OTU_C_28	2	AB712269	1.04258e-27	76.43	Eukaryota	Fungi	Dikarya	Basidiomycota	Agaricomycotina	Agaricomycetes	environmental samples
OTU_C_46	1	KP013050	2.53417e-123	96.38	Eukaryota	Fungi	Dikarya	Basidiomycota	Agaricomycotina	Agaricomycetes	Polyporales	Polyporaceae
OTU_C_34	1	KM370119	6.89556e-139	99.64	Eukaryota	Fungi	Dikarya	Basidiomycota	Ustilaginomycotina	Malasseziomycetes	Malasseziales	Malasseziaceae	Malassezia
OTU_C_8	69	JQ311233	7.61616e-69	84.59	Eukaryota	Fungi	environmental samples
OTU_C_15	1	KF567957	1.98695e-114	94.55	Eukaryota	Fungi	environmental samples
OTU_C_16	8	JX534900	4.27067e-116	98.35	Eukaryota	Fungi	environmental samples
OTU_C_23	2	KF566541	5.48552e-120	95.64	Eukaryota	Fungi	environmental samples
OTU_C_33	1	KF568595	1.62545e-75	86.72	Eukaryota	Fungi	environmental samples
OTU_C_10	18	KM056329	2.48096e-138	99.64	Eukaryota	Fungi	Fungi incertae sedis	Mucoromycotina	Mucorales	Mucorineae	Mucoraceae	Mucor
OTU_C_6	73	KF436392	5.37033e-135	98.91	Eukaryota	Fungi
OTU_C_30	1	KF435295	4.18099e-131	98.88	Eukaryota	Fungi
OTU_C_2	350	JQ000370	1.52464e-120	95.64	Eukaryota	Metazoa	Ecdysozoa	Arthropoda	Chelicerata	Arachnida	Acari	Acariformes	Sarcoptiformes	Astigmata	Histiostomatoidea	Histiostomatidae	Anoetus
OTU_C_3	147	JQ000359	1.94523e-129	97.45	Eukaryota	Metazoa	Ecdysozoa	Arthropoda	Chelicerata	Arachnida	Acari	Acariformes	Sarcoptiformes	Astigmata	Histiostomatoidea	Histiostomatidae	Ovanoetus
OTU_C_9	6	JQ000368	1.53601e-115	94.18	Eukaryota	Metazoa	Ecdysozoa	Arthropoda	Chelicerata	Arachnida	Acari	Acariformes	Sarcoptiformes	Astigmata	Histiostomatoidea	Histiostomatidae	Sellea
OTU_C_21	1	JQ000370	2.606e-103	92.36	Eukaryota	Metazoa	Ecdysozoa	Arthropoda	Chelicerata	Arachnida	Acari	Acariformes	Sarcoptiformes	Astigmata	Histiostomatoidea	Histiostomatidae	Anoetus
OTU_C_22	24	JQ000370	2.56938e-113	94.51	Eukaryota	Metazoa	Ecdysozoa	Arthropoda	Chelicerata	Arachnida	Acari	Acariformes	Sarcoptiformes	Astigmata	Histiostomatoidea	Histiostomatidae	Anoetus
OTU_C_26	1	JQ000370	5.60122e-105	92.73	Eukaryota	Metazoa	Ecdysozoa	Arthropoda	Chelicerata	Arachnida	Acari	Acariformes	Sarcoptiformes	Astigmata	Histiostomatoidea	Histiostomatidae	Anoetus
OTU_C_44	1	JQ000370	5.64099e-100	93.68	Eukaryota	Metazoa	Ecdysozoa	Arthropoda	Chelicerata	Arachnida	Acari	Acariformes	Sarcoptiformes	Astigmata	Histiostomatoidea	Histiostomatidae	Anoetus
OTU_C_4	36	EF012972	1.48262e-140	100	Eukaryota	Metazoa	Ecdysozoa	Arthropoda	Hexapoda	Insecta	Pterygota	Neoptera	Endopterygota	Hymenoptera	Apocrita	Aculeata	Vespoidea	Formicidae	Formicinae	Brachymyrmex
OTU_C_12	9	EF013063	5.37033e-135	98.91	Eukaryota	Metazoa	Ecdysozoa	Arthropoda	Hexapoda	Insecta	Pterygota	Neoptera	Endopterygota	Hymenoptera	Apocrita	Aculeata	Vespoidea	Formicidae	Myrmicinae	Solenopsis
OTU_C_5	70	EU145710	1.24769e-81	87.5	Eukaryota	Metazoa	Ecdysozoa	Arthropoda	Hexapoda	Insecta	Pterygota	Neoptera	Endopterygota	Coleoptera	Polyphaga	Cucujiformia	Silvanidae	Brontinae	Uleiota
OTU_C_43	2	FJ409577	1.7814e-10	88.71	Eukaryota	Metazoa	Lophotrochozoa	Bryozoa	Gymnolaemata	Ctenostomatida	Flustrellidridae	Flustrellidra
OTU_C_48	3	JX545288	6.01395e-55	83.61	Eukaryota	Metazoa	Lophotrochozoa	Annelida	Clitellata	Oligochaeta	Haplotaxida	Lumbricina	Megascolecidae	Plutellus	environmental samples
OTU_C_41	1	4W1Z_5	1.48262e-140	100	Eukaryota	Metazoa	Chordata	Craniata	Vertebrata	Euteleostomi	Mammalia	Eutheria	Laurasiatheria	Cetartiodactyla	Suina	Suidae	Sus
OTU_C_11	12	KC832958	6.94452e-134	98.55	Eukaryota	Alveolata	Ciliophora	Intramacronucleata	Nassophorea	Microthoracida	Microthoracidae	Leptopharynx
OTU_C_27	3	KC832958	4.2092e-126	97.09	Eukaryota	Alveolata	Ciliophora	Intramacronucleata	Nassophorea	Microthoracida	Microthoracidae	Leptopharynx
OTU_C_35	1	KC832958	4.23908e-121	96	Eukaryota	Alveolata	Ciliophora	Intramacronucleata	Nassophorea	Microthoracida	Microthoracidae	Leptopharynx
OTU_C_42	1	KC832958	5.88765e-70	84.78	Eukaryota	Alveolata	Ciliophora	Intramacronucleata	Nassophorea	Microthoracida	Microthoracidae	Leptopharynx
OTU_C_7	11	AJ584697	8.00001e-34	77.42	Eukaryota	Amoebozoa	Mycetozoa	Myxogastria	Myxogastromycetidae	Physariida	Physaraceae	Fuligo
OTU_C_37	20	AJ584697	1.7317e-30	77.04	Eukaryota	Amoebozoa	Mycetozoa	Myxogastria	Myxogastromycetidae	Physariida	Physaraceae	Fuligo
OTU_C_32	4	GU928192	8.29097e-09	93.75	Eukaryota	environmental samples
OTU_C_14	1	NR_076660	2.14775e-59	82.31	Bacteria	Bacteroidetes	Sphingobacteriia	Sphingobacteriales	Sphingobacteriaceae	Pedobacter
OTU_C_24	4	NR_076660	6.01184e-55	81.59	Bacteria	Bacteroidetes	Sphingobacteriia	Sphingobacteriales	Sphingobacteriaceae	Pedobacter
OTU_C_45	1	CP002545	1.71949e-35	77.82	Bacteria	Bacteroidetes	Sphingobacteriia	Sphingobacteriales	Sphingobacteriaceae	Pseudopedobacter
OTU_C_13	3	NO MATCH WITH THESE SEARCH PARAMETERS
OTU_C_18	2	NO MATCH WITH THESE SEARCH PARAMETERS
OTU_C_19	6	NO MATCH WITH THESE SEARCH PARAMETERS
OTU_C_47	2	NO MATCH WITH THESE SEARCH PARAMETERS

## Sheet: K
OTU	Sequences	GenBank_identifier	E-value	Percent_Identity	Taxonomy
OTU_K_9	5	KP306939	2.48096e-138	99.64	Eukaryota	Fungi	Dikarya	Ascomycota	Pezizomycotina	Sordariomycetes	Xylariomycetidae	Xylariales	Amphisphaeriaceae	Pestalotiopsis
OTU_K_10	5	KP192855	1.48262e-140	100	Eukaryota	Fungi	Dikarya	Ascomycota	Pezizomycotina	Sordariomycetes	Sordariomycetes incertae sedis	Trichosphaeriales	Trichosphaeriaceae	Nigrospora
OTU_K_12	21	KP143685	6.89798e-139	99.64	Eukaryota	Fungi	Dikarya	Ascomycota	Pezizomycotina	Dothideomycetes	Dothideomycetidae	Capnodiales	Cladosporiaceae	Cladosporium
OTU_K_17	9	KP122800	1.48262e-140	100	Eukaryota	Fungi	Dikarya	Ascomycota	Pezizomycotina	Sordariomycetes	Hypocreomycetidae	Hypocreales	Nectriaceae	Fusarium	Fusarium fujikuroi species complex
OTU_K_18	9	HG965074	1.48262e-140	100	Eukaryota	Fungi	Dikarya	Ascomycota	Pezizomycotina	Sordariomycetes	Hypocreomycetidae	Hypocreales	mitosporic Hypocreales	Sarocladium
OTU_K_24	1	AB808244	5.52447e-115	94.93	Eukaryota	Fungi	Dikarya	Ascomycota	Pezizomycotina	Sordariomycetes	Hypocreomycetidae	Microascales	Halosphaeriaceae	mitosporic Halosphaeriaceae	Periconia
OTU_K_25	3	JF499862	2.48096e-138	99.64	Eukaryota	Fungi	Dikarya	Ascomycota	Pezizomycotina	Dothideomycetes	Dothideomycetidae	Capnodiales	Capnodiales incertae sedis	Penidiella
OTU_K_33	1	JQ649347	6.99628e-129	97.45	Eukaryota	Fungi	Dikarya	Ascomycota	Pezizomycotina	Sordariomycetes	Hypocreomycetidae	Hypocreales	unclassified Hypocreales
OTU_K_39	1	JQ889293	2.51631e-128	97.46	Eukaryota	Fungi	Dikarya	Ascomycota	Pezizomycotina	Sordariomycetes	Sordariomycetidae	Chaetosphaeriales	Chaetosphaeriaceae	Dinemasporium
OTU_K_44	1	KM386435	2.49857e-133	99.25	Eukaryota	Fungi	Dikarya	Ascomycota	Pezizomycotina	Eurotiomycetes	Eurotiomycetidae	Eurotiales	Aspergillaceae	Aspergillus
OTU_K_45	1	AF033439	5.37033e-135	98.91	Eukaryota	Fungi	Dikarya	Ascomycota	Pezizomycotina	Eurotiomycetes	Eurotiomycetidae	Eurotiales	Aspergillaceae	Penicillium
OTU_K_50	2	JQ922194	3.27816e-122	96.01	Eukaryota	Fungi	Dikarya	Ascomycota	Pezizomycotina	Sordariomycetes	Hypocreomycetidae	Hypocreales	unclassified Hypocreales
OTU_K_56	1	GQ153025	2.48096e-138	99.64	Eukaryota	Fungi	Dikarya	Ascomycota	Pezizomycotina	Dothideomycetes	unclassified Dothideomycetes
OTU_K_67	2	KM272363	6.99628e-129	97.45	Eukaryota	Fungi	Dikarya	Ascomycota	Pezizomycotina	Pezizomycotina incertae sedis	Asteromyces
OTU_K_71	1	JF449494	5.40845e-130	98.51	Eukaryota	Fungi	Dikarya	Ascomycota	Pezizomycotina	environmental samples
OTU_K_72	1	KP401925	2.53417e-123	96.39	Eukaryota	Fungi	Dikarya	Ascomycota	Pezizomycotina	Sordariomycetes	Hypocreomycetidae	Hypocreales	mitosporic Hypocreales	Acremonium
OTU_K_2	205	KM246049	2.48096e-138	99.64	Eukaryota	Fungi	Dikarya	Ascomycota	Saccharomycotina	Saccharomycetes	Saccharomycetales	Debaryomycetaceae	Candida glaebosa clade
OTU_K_42	4	KM246049	1.50375e-130	98.18	Eukaryota	Fungi	Dikarya	Ascomycota	Saccharomycotina	Saccharomycetes	Saccharomycetales	Debaryomycetaceae	Candida glaebosa clade
OTU_K_62	1	EU490168	3.20932e-137	99.28	Eukaryota	Fungi	Dikarya	Ascomycota	environmental samples
OTU_K_55	1	JF925333	2.48096e-138	99.64	Eukaryota	Fungi	Dikarya	Basidiomycota	Agaricomycotina	Agaricomycetes	Russulales	Peniophoraceae	Peniophora
OTU_K_15	12	KJ917974	1.48262e-140	100	Eukaryota	Fungi	Dikarya	Basidiomycota	Agaricomycotina	Tremellomycetes	Tremellales	Tremellales incertae sedis	Hannaella
OTU_K_58	1	KC798409	1.49315e-135	98.92	Eukaryota	Fungi	Dikarya	Basidiomycota	Agaricomycotina	Tremellomycetes	Tremellales	Tremellales incertae sedis	Cryptococcus
OTU_K_65	1	KM555190	1.52518e-120	95.65	Eukaryota	Fungi	Dikarya	Basidiomycota	Agaricomycotina	Tremellomycetes	Tremellales	Tremellales incertae sedis	Cryptococcus
OTU_K_66	1	KM246145	1.50375e-130	98.17	Eukaryota	Fungi	Dikarya	Basidiomycota	Agaricomycotina	Tremellomycetes	Tremellales	Tremellales incertae sedis	Cryptococcus
OTU_K_36	1	KJ847249	1.48262e-140	100	Eukaryota	Fungi	Dikarya	Basidiomycota	Ustilaginomycotina	Malasseziomycetes	Malasseziales	Malasseziaceae	Malassezia
OTU_K_41	1	KC439362	3.20932e-137	99.27	Eukaryota	Fungi	Dikarya	Basidiomycota	Ustilaginomycotina	Ustilaginomycetes	Ustilaginales	Ustilaginaceae	mitosporic Ustilaginaceae	Pseudozyma
OTU_K_35	1	AB520301	4.18099e-131	98.18	Eukaryota	Fungi	environmental samples
OTU_K_37	1	KF567809	9.05026e-128	97.78	Eukaryota	Fungi	environmental samples
OTU_K_43	1	KC557503	1.49315e-135	98.91	Eukaryota	Fungi	environmental samples
OTU_K_46	3	KF567183	1.50375e-130	97.51	Eukaryota	Fungi	environmental samples
OTU_K_52	1	KC965452	3.32487e-112	94.49	Eukaryota	Fungi	environmental samples
OTU_K_63	1	KF567183	9.17922e-118	96.28	Eukaryota	Fungi	environmental samples
OTU_K_68	1	KJ173582	1.93151e-134	99.63	Eukaryota	Fungi	environmental samples
OTU_K_74	1	KC965452	3.27816e-122	96.34	Eukaryota	Fungi	environmental samples
OTU_K_60	3	JN206504	1.48262e-140	100	Eukaryota	Fungi	Fungi incertae sedis	Mucoromycotina	Mucorales	Mucorineae	Mucoraceae	Mucor
OTU_K_64	1	JN206518	3.25505e-127	97.09	Eukaryota	Fungi	Fungi incertae sedis	Mucoromycotina	Mucorales	Mucorineae	Mucoraceae	Mucor
OTU_K_7	36	KF436392	2.49857e-133	98.55	Eukaryota	Fungi
OTU_K_61	1	KR080791	2.48096e-138	99.64	Eukaryota	Fungi
OTU_K_1	160	JQ000370	1.52518e-120	95.64	Eukaryota	Metazoa	Ecdysozoa	Arthropoda	Chelicerata	Arachnida	Acari	Acariformes	Sarcoptiformes	Astigmata	Histiostomatoidea	Histiostomatidae	Anoetus
OTU_K_4	74	JQ000359	1.94523e-129	97.45	Eukaryota	Metazoa	Ecdysozoa	Arthropoda	Chelicerata	Arachnida	Acari	Acariformes	Sarcoptiformes	Astigmata	Histiostomatoidea	Histiostomatidae	Ovanoetus
OTU_K_14	3	JQ000368	3.32487e-112	93.45	Eukaryota	Metazoa	Ecdysozoa	Arthropoda	Chelicerata	Arachnida	Acari	Acariformes	Sarcoptiformes	Astigmata	Histiostomatoidea	Histiostomatidae	Sellea
OTU_K_38	1	JQ000370	2.58853e-108	93.45	Eukaryota	Metazoa	Ecdysozoa	Arthropoda	Chelicerata	Arachnida	Acari	Acariformes	Sarcoptiformes	Astigmata	Histiostomatoidea	Histiostomatidae	Anoetus
OTU_K_13	34	AF134363	9.37612e-103	91.76	Eukaryota	Metazoa	Ecdysozoa	Arthropoda	Chelicerata	Arachnida	Araneae	Araneomorphae	Entelegynae	Amaurobiidae	Coelotes
OTU_K_19	19	JX145769	3.34848e-107	97.05	Eukaryota	Metazoa	Ecdysozoa	Arthropoda	Chelicerata	Arachnida	Araneae	Araneomorphae	Entelegynae	Dionycha	Salticidae	Salticoida	Marpissoida	Marpissinae
OTU_K_23	5	JX145745	7.04595e-124	99.6	Eukaryota	Metazoa	Ecdysozoa	Arthropoda	Chelicerata	Arachnida	Araneae	Araneomorphae	Entelegynae	Dionycha	Salticidae	Salticoida	Amycoida	Thiodininae	Thiodina
OTU_K_28	2	JQ312076	2.02957e-99	91.82	Eukaryota	Metazoa	Ecdysozoa	Arthropoda	Chelicerata	Arachnida	Araneae	Araneomorphae	Entelegynae	Dionycha	Philodromidae	Philodromus
OTU_K_32	7	AY210461	2.01527e-104	92.09	Eukaryota	Metazoa	Ecdysozoa	Arthropoda	Chelicerata	Arachnida	Araneae	Araneomorphae	Entelegynae	Dionycha	Thomisidae	Mecaphesa
OTU_K_59	1	JX145745	3.30143e-117	97.63	Eukaryota	Metazoa	Ecdysozoa	Arthropoda	Chelicerata	Arachnida	Araneae	Araneomorphae	Entelegynae	Dionycha	Salticidae	Salticoida	Amycoida	Thiodininae	Thiodina
OTU_K_73	5	JX145769	7.29964e-99	94.94	Eukaryota	Metazoa	Ecdysozoa	Arthropoda	Chelicerata	Arachnida	Araneae	Araneomorphae	Entelegynae	Dionycha	Salticidae	Salticoida	Marpissoida	Marpissinae
OTU_K_75	1	JQ312076	1.60261e-85	88.73	Eukaryota	Metazoa	Ecdysozoa	Arthropoda	Chelicerata	Arachnida	Araneae	Araneomorphae	Entelegynae	Dionycha	Philodromidae	Philodromus
OTU_K_8	16	EU145710	1.24769e-81	87.5	Eukaryota	Metazoa	Ecdysozoa	Arthropoda	Hexapoda	Insecta	Pterygota	Neoptera	Endopterygota	Coleoptera	Polyphaga	Cucujiformia	Silvanidae	Brontinae	Uleiota
OTU_K_21	19	KJ845077	7.40366e-89	88.77	Eukaryota	Metazoa	Ecdysozoa	Arthropoda	Hexapoda	Insecta	Pterygota	Neoptera	Endopterygota	Coleoptera	Polyphaga	Staphyliniformia	Staphylinidae	Omaliinae group	Glypholomatinae	Glypholoma
OTU_K_51	2	KC177760	1.49315e-135	98.91	Eukaryota	Metazoa	Ecdysozoa	Arthropoda	Hexapoda	Insecta	Pterygota	Neoptera	Endopterygota	Diptera	Brachycera	Muscomorpha	Lauxanioidea	Lauxaniidae	Minettia
OTU_K_5	51	EF013034	1.48262e-140	100	Eukaryota	Metazoa	Ecdysozoa	Arthropoda	Hexapoda	Insecta	Pterygota	Neoptera	Endopterygota	Hymenoptera	Apocrita	Aculeata	Vespoidea	Formicidae	Formicinae	Nylanderia
OTU_K_6	73	AY703610	1.48262e-140	100	Eukaryota	Metazoa	Ecdysozoa	Arthropoda	Hexapoda	Insecta	Pterygota	Neoptera	Endopterygota	Hymenoptera	Apocrita	Aculeata	Vespoidea	Formicidae	Pseudomyrmecinae	Pseudomyrmex
OTU_K_11	3	DQ353637	6.99628e-129	98.14	Eukaryota	Metazoa	Ecdysozoa	Arthropoda	Hexapoda	Insecta	Pterygota	Neoptera	Endopterygota	Hymenoptera	Apocrita	Aculeata	Vespoidea	Formicidae	Myrmicinae	Crematogaster	Crematogaster
OTU_K_20	2	GQ374781	2.51631e-128	97.46	Eukaryota	Metazoa	Ecdysozoa	Arthropoda	Hexapoda	Insecta	Pterygota	Neoptera	Endopterygota	Hymenoptera	Apocrita	Chalcidoidea	Aphelinidae	Coccophaginae	Coccophagus
OTU_K_22	2	DQ353637	1.17904e-121	96	Eukaryota	Metazoa	Ecdysozoa	Arthropoda	Hexapoda	Insecta	Pterygota	Neoptera	Endopterygota	Hymenoptera	Apocrita	Aculeata	Vespoidea	Formicidae	Myrmicinae	Crematogaster	Crematogaster
OTU_K_26	1	EF013063	6.99628e-129	97.45	Eukaryota	Metazoa	Ecdysozoa	Arthropoda	Hexapoda	Insecta	Pterygota	Neoptera	Endopterygota	Hymenoptera	Apocrita	Aculeata	Vespoidea	Formicidae	Myrmicinae	Solenopsis
OTU_K_27	1	EF012984	1.97294e-119	96.28	Eukaryota	Metazoa	Ecdysozoa	Arthropoda	Hexapoda	Insecta	Pterygota	Neoptera	Endopterygota	Hymenoptera	Apocrita	Aculeata	Vespoidea	Formicidae	Myrmicinae	Crematogaster	Crematogaster
OTU_K_29	4	KJ860020	4.30099e-111	93.5	Eukaryota	Metazoa	Ecdysozoa	Arthropoda	Hexapoda	Insecta	Pterygota	Neoptera	Endopterygota	Hymenoptera	Apocrita	Aculeata	Vespoidea	Formicidae	Myrmicinae	Stenamma
OTU_K_34	1	AY703589	2.51631e-128	97.45	Eukaryota	Metazoa	Ecdysozoa	Arthropoda	Hexapoda	Insecta	Pterygota	Neoptera	Endopterygota	Hymenoptera	Apocrita	Aculeata	Vespoidea	Formicidae	Pseudomyrmecinae	Pseudomyrmex
OTU_K_40	1	AY703610	1.51443e-125	96.74	Eukaryota	Metazoa	Ecdysozoa	Arthropoda	Hexapoda	Insecta	Pterygota	Neoptera	Endopterygota	Hymenoptera	Apocrita	Aculeata	Vespoidea	Formicidae	Pseudomyrmecinae	Pseudomyrmex
OTU_K_47	2	EF012984	3.27816e-122	95.74	Eukaryota	Metazoa	Ecdysozoa	Arthropoda	Hexapoda	Insecta	Pterygota	Neoptera	Endopterygota	Hymenoptera	Apocrita	Aculeata	Vespoidea	Formicidae	Myrmicinae	Crematogaster	Crematogaster
OTU_K_48	2	GQ374778	3.20932e-137	99.27	Eukaryota	Metazoa	Ecdysozoa	Arthropoda	Hexapoda	Insecta	Pterygota	Neoptera	Endopterygota	Hymenoptera	Apocrita	Chalcidoidea	Eurytomidae	Eurytominae	Eurytoma
OTU_K_54	1	GQ374733	6.99628e-129	98.14	Eukaryota	Metazoa	Ecdysozoa	Arthropoda	Hexapoda	Insecta	Pterygota	Neoptera	Endopterygota	Hymenoptera	Apocrita	Ceraphronoidea	Ceraphronidae	Ceraphron
OTU_K_57	7	FJ939794	3.20932e-137	99.27	Eukaryota	Metazoa	Ecdysozoa	Arthropoda	Hexapoda	Insecta	Pterygota	Neoptera	Endopterygota	Hymenoptera	Apocrita	Aculeata	Vespoidea	Formicidae	Dolichoderinae	Forelius
OTU_K_16	2	EF622908	8.17449e-19	79.19	Eukaryota	Metazoa	Ecdysozoa	Arthropoda	Hexapoda	Insecta	Pterygota	Neoptera	Plecoptera	Nemouroidea	Notonemouridae	Austrocercella
OTU_K_31	1	FJ411426	6.94696e-134	98.55	Eukaryota	Metazoa	Ecdysozoa	Arthropoda	Hexapoda	Collembola	Collembola	Symphypleona	Bourletiellidae	Bourletiella
OTU_K_3	82	DQ145650	7.72469e-59	83.65	Eukaryota	Metazoa	Ecdysozoa	Nematoda
OTU_K_30	126	DQ145650	6.01395e-55	82.89	Eukaryota	Metazoa	Ecdysozoa	Nematoda
OTU_K_70	2	DQ145650	2.79802e-53	82.4	Eukaryota	Metazoa	Ecdysozoa	Nematoda
OTU_K_53	4	AJ584697	6.18656e-35	77.7	Eukaryota	Amoebozoa	Mycetozoa	Myxogastria	Myxogastromycetidae	Physariida	Physaraceae	Fuligo
OTU_K_69	1	KC183332	3.37225e-102	92.57	Eukaryota	Euglenozoa	Kinetoplastida	Trypanosomatidae	environmental samples
OTU_K_49	1	NO BLAST MATCH WITH THESE SEARCH PARAMETERS

## Sheet: L
OTU	Sequences	GenBank_identifier	E-value	Percent_Identity	Taxonomy
OTU_L_14	5	KR094461	2.62405e-138	99.64	Eukaryota	Fungi	Dikarya	Ascomycota	Pezizomycotina	Dothideomycetes	Epicoccum
OTU_L_15	4	KP963944	1.56814e-140	100	Eukaryota	Fungi	Dikarya	Ascomycota	Pezizomycotina	Dothideomycetes	Dothideomycetidae	Capnodiales	Cladosporiaceae	Cladosporium
OTU_L_25	6	HG421426	1.21828e-136	99.27	Eukaryota	Fungi	Dikarya	Ascomycota	Pezizomycotina	Dothideomycetes	Dothideomycetidae	Dothideales	Aureobasidiaceae	Aureobasidium
OTU_L_68	2	KT236303	1.56483e-140	100	Eukaryota	Fungi	Dikarya	Ascomycota	Pezizomycotina	Dothideomycetes	Pleosporomycetidae	Pleosporales	Pleosporineae	Pleosporaceae	Alternaria
OTU_L_75	1	HM595588	2.65583e-128	97.45	Eukaryota	Fungi	Dikarya	Ascomycota	Pezizomycotina	Dothideomycetes	Dothideomycetidae	Myriangiales	Myriangiaceae	unclassified Myriangiaceae
OTU_L_16	20	KM099503	7.29585e-139	99.64	Eukaryota	Fungi	Dikarya	Ascomycota	Pezizomycotina	Eurotiomycetes	Eurotiomycetidae	Eurotiales	Aspergillaceae	Penicillium
OTU_L_58	1	AF033439	3.41131e-132	98.53	Eukaryota	Fungi	Dikarya	Ascomycota	Pezizomycotina	Eurotiomycetes	Eurotiomycetidae	Eurotiales	Aspergillaceae	Penicillium
OTU_L_80	1	KM012005	1.22693e-131	98.18	Eukaryota	Fungi	Dikarya	Ascomycota	Pezizomycotina	Eurotiomycetes	Eurotiomycetidae	Eurotiales	Trichocomaceae	Talaromyces
OTU_L_17	28	KR094457	2.62405e-138	99.64	Eukaryota	Fungi	Dikarya	Ascomycota	Pezizomycotina	Sordariomycetes	Hypocreomycetidae	Hypocreales	Nectriaceae	Fusarium	Fusarium incarnatum-equiseti species complex
OTU_L_42	4	KR906694	1.59049e-130	98.18	Eukaryota	Fungi	Dikarya	Ascomycota	Pezizomycotina	Sordariomycetes	Hypocreomycetidae	Hypocreales	Nectriaceae	Fusarium	Fusarium fujikuroi species complex
OTU_L_50	1	KP325443	2.61852e-138	99.64	Eukaryota	Fungi	Dikarya	Ascomycota	Pezizomycotina	Sordariomycetes	Xylariomycetidae	Xylariales	Amphisphaeriaceae	Atrotorquata
OTU_L_73	1	FJ588240	7.28045e-139	99.64	Eukaryota	Fungi	Dikarya	Ascomycota	Pezizomycotina	Sordariomycetes	Hypocreomycetidae	Glomerellales	Glomerellaceae	Colletotrichum
OTU_L_82	1	KJ130983	7.43662e-124	96.38	Eukaryota	Fungi	Dikarya	Ascomycota	Pezizomycotina	Sordariomycetes	Hypocreomycetidae	Hypocreales	Cordycipitaceae	Simplicillium
OTU_L_67	2	DQ248313	5.70833e-130	97.82	Eukaryota	Fungi	Dikarya	Ascomycota	Pezizomycotina	Xylonomycetes	Xylonomycetales	Xylonomycetales incertae sedis	Symbiotaphrina
OTU_L_1	662	NG_042771	2.62405e-138	99.64	Eukaryota	Fungi	Dikarya	Ascomycota	Saccharomycotina	Saccharomycetes	Saccharomycetales	Debaryomycetaceae	Candida glaebosa clade
OTU_L_24	1	KM246049	1.67955e-90	89.49	Eukaryota	Fungi	Dikarya	Ascomycota	Saccharomycotina	Saccharomycetes	Saccharomycetales	Debaryomycetaceae	Candida glaebosa clade
OTU_L_37	9	KM246049	3.43553e-127	97.44	Eukaryota	Fungi	Dikarya	Ascomycota	Saccharomycotina	Saccharomycetes	Saccharomycetales	Debaryomycetaceae	Candida glaebosa clade
OTU_L_39	1	KF826535	3.43553e-127	97.09	Eukaryota	Fungi	Dikarya	Ascomycota	Saccharomycotina	Saccharomycetes	Saccharomycetales	mitosporic Saccharomycetales	Candida
OTU_L_45	3	KM246049	1.58713e-130	97.52	Eukaryota	Fungi	Dikarya	Ascomycota	Saccharomycotina	Saccharomycetes	Saccharomycetales	Debaryomycetaceae	Candida glaebosa clade
OTU_L_52	20	NG_042771	1.24704e-121	96.38	Eukaryota	Fungi	Dikarya	Ascomycota	Saccharomycotina	Saccharomycetes	Saccharomycetales	Debaryomycetaceae	Candida glaebosa clade
OTU_L_53	1	KM246049	1.31687e-81	87.73	Eukaryota	Fungi	Dikarya	Ascomycota	Saccharomycotina	Saccharomycetes	Saccharomycetales	Debaryomycetaceae	Candida glaebosa clade
OTU_L_56	176	KM246049	1.58713e-130	98.18	Eukaryota	Fungi	Dikarya	Ascomycota	Saccharomycotina	Saccharomycetes	Saccharomycetales	Debaryomycetaceae	Candida glaebosa clade
OTU_L_63	2	KM246049	1.23564e-126	97.45	Eukaryota	Fungi	Dikarya	Ascomycota	Saccharomycotina	Saccharomycetes	Saccharomycetales	Debaryomycetaceae	Candida glaebosa clade
OTU_L_65	1	KM246049	2.05308e-129	97.82	Eukaryota	Fungi	Dikarya	Ascomycota	Saccharomycotina	Saccharomycetes	Saccharomycetales	Debaryomycetaceae	Candida glaebosa clade
OTU_L_13	7	AF363650	3.38726e-137	99.27	Eukaryota	Fungi	Dikarya	Basidiomycota	Agaricomycotina	Tremellomycetes	Tremellales	Tremellales incertae sedis	Kockovaella
OTU_L_32	2	KP825398	1.56483e-140	100	Eukaryota	Fungi	Dikarya	Basidiomycota	Ustilaginomycotina	Malasseziomycetes	Malasseziales	Malasseziaceae	Malassezia
OTU_L_33	2	KP780476	1.22952e-131	98.18	Eukaryota	Fungi	Dikarya	Basidiomycota	Agaricomycotina	Tremellomycetes	Tremellales	Tremellales incertae sedis	Cryptococcus
OTU_L_43	1	AJ406447	2.04292e-134	98.9	Eukaryota	Fungi	Dikarya	Basidiomycota	Agaricomycotina	Agaricomycetes	Corticiales	Corticiaceae	Tubulicrinis
OTU_L_46	1	EF363144	1.57594e-135	98.91	Eukaryota	Fungi	Dikarya	Basidiomycota	Agaricomycotina	Tremellomycetes	Tremellales	Tremellales incertae sedis	Cryptococcus
OTU_L_48	3	KP297997	7.28045e-139	99.64	Eukaryota	Fungi	Dikarya	Basidiomycota	Ustilaginomycotina	Ustilaginomycetes	Ustilaginales	Ustilaginaceae	Anthracocystis
OTU_L_72	1	AB638334	2.75145e-103	92	Eukaryota	Fungi	Dikarya	Basidiomycota	Pucciniomycotina	Agaricostilbomycetes	Agaricostilbomycetes incertae sedis	mitosporic Agaricostilbomycetidae	Sporobolomyces
OTU_L_78	2	GU055678	5.08351e-31	77.26	Eukaryota	Fungi	Blastocladiomycota	environmental samples
OTU_L_10	19	KF566189	1.58713e-130	97.82	Eukaryota	Fungi	environmental samples
OTU_L_18	6	KF566557	3.38726e-137	99.27	Eukaryota	Fungi	environmental samples
OTU_L_20	4	KF567167	6.76469e-10	95.74	Eukaryota	Fungi	environmental samples
OTU_L_21	12	KF568245	3.38726e-137	99.28	Eukaryota	Fungi	environmental samples
OTU_L_22	24	JQ311373	2.65583e-128	97.45	Eukaryota	Fungi	environmental samples
OTU_L_23	2	JX898659	8.68899e-14	89.71	Eukaryota	Fungi	environmental samples
OTU_L_28	4	KF567809	9.55206e-128	97.45	Eukaryota	Fungi	environmental samples
OTU_L_29	5	JQ311373	5.66809e-135	98.91	Eukaryota	Fungi	environmental samples
OTU_L_41	2	EU861693	1.29194e-96	91.14	Eukaryota	Fungi	environmental samples
OTU_L_54	1	KF567865	9.82623e-108	92.83	Eukaryota	Fungi	environmental samples
OTU_L_70	1	JN890104	7.3842e-129	97.45	Eukaryota	Fungi	environmental samples
OTU_L_71	1	KF566230	8.62773e-19	95.38	Eukaryota	Fungi	environmental samples
OTU_L_76	1	KF750514	1.56483e-140	100	Eukaryota	Fungi	environmental samples
OTU_L_79	1	DQ365457	1.65595e-100	91.3	Eukaryota	Fungi	environmental samples
OTU_L_8	59	KM056329	1.56483e-140	100	Eukaryota	Fungi	Fungi incertae sedis	Mucoromycotina	Mucorales	Mucorineae	Mucoraceae	Mucor
OTU_L_11	13	KM242293	1.56483e-140	100	Eukaryota	Fungi	Fungi incertae sedis	Mucoromycotina	Mucorales	Mucorineae	Mucoraceae	Mucor
OTU_L_47	3	KP311363	3.41131e-132	98.18	Eukaryota	Fungi	Fungi incertae sedis	Mortierellomycotina	Mortierellales	Mortierellaceae	Mortierella
OTU_L_64	1	JN206518	2.67468e-123	96.36	Eukaryota	Fungi	Fungi incertae sedis	Mucoromycotina	Mucorales	Mucorineae	Mucoraceae	Mucor
OTU_L_4	281	KF436392	5.68008e-135	98.91	Eukaryota	Fungi
OTU_L_26	5	KR080807	1.56483e-140	100	Eukaryota	Fungi
OTU_L_34	2	KF436392	2.10156e-114	95.51	Eukaryota	Fungi
OTU_L_40	1	KF436392	7.43662e-124	96.73	Eukaryota	Fungi
OTU_L_44	1	KF435681	1.56483e-140	100	Eukaryota	Fungi
OTU_L_59	1	KF436218	5.66809e-135	98.91	Eukaryota	Fungi
OTU_L_2	315	JQ000359	2.05742e-129	97.45	Eukaryota	Metazoa	Ecdysozoa	Arthropoda	Chelicerata	Arachnida	Acari	Acariformes	Sarcoptiformes	Astigmata	Histiostomatoidea	Histiostomatidae	Ovanoetus
OTU_L_3	194	JQ000370	1.61315e-120	95.64	Eukaryota	Metazoa	Ecdysozoa	Arthropoda	Chelicerata	Arachnida	Acari	Acariformes	Sarcoptiformes	Astigmata	Histiostomatoidea	Histiostomatidae	Anoetus
OTU_L_31	1	JQ000359	7.55854e-114	94.55	Eukaryota	Metazoa	Ecdysozoa	Arthropoda	Chelicerata	Arachnida	Acari	Acariformes	Sarcoptiformes	Astigmata	Histiostomatoidea	Histiostomatidae	Ovanoetus
OTU_L_36	1	JQ000370	2.73206e-108	93.09	Eukaryota	Metazoa	Ecdysozoa	Arthropoda	Chelicerata	Arachnida	Acari	Acariformes	Sarcoptiformes	Astigmata	Histiostomatoidea	Histiostomatidae	Anoetus
OTU_L_61	2	JQ000359	7.54259e-114	94.18	Eukaryota	Metazoa	Ecdysozoa	Arthropoda	Chelicerata	Arachnida	Acari	Acariformes	Sarcoptiformes	Astigmata	Histiostomatoidea	Histiostomatidae	Ovanoetus
OTU_L_77	1	JQ000370	1.64428e-105	92.75	Eukaryota	Metazoa	Ecdysozoa	Arthropoda	Chelicerata	Arachnida	Acari	Acariformes	Sarcoptiformes	Astigmata	Histiostomatoidea	Histiostomatidae	Anoetus
OTU_L_12	4	HQ832608	7.28045e-139	99.64	Eukaryota	Metazoa	Ecdysozoa	Arthropoda	Hexapoda	Insecta	Pterygota	Neoptera	Endopterygota	Coleoptera	Polyphaga	Cucujiformia	Chrysomeloidea	Cerambycidae	Lamiinae	Monochamini	Monochamus
OTU_L_38	5	KJ845168	9.68817e-118	96.24	Eukaryota	Metazoa	Ecdysozoa	Arthropoda	Hexapoda	Insecta	Pterygota	Neoptera	Endopterygota	Coleoptera	Polyphaga	Staphyliniformia	Staphylinidae	Omaliinae group	Pselaphinae	Adranes
OTU_L_74	1	KC177715	1.25324e-116	94.91	Eukaryota	Metazoa	Ecdysozoa	Arthropoda	Hexapoda	Insecta	Pterygota	Neoptera	Endopterygota	Diptera	Brachycera	Muscomorpha	Empidoidea	Dolichopodidae	Neurigoninae	Neurigona
OTU_L_27	4	DQ768533	2.63711e-133	98.9	Eukaryota	Metazoa	Ecdysozoa	Arthropoda	Hexapoda	Insecta	Pterygota	Neoptera	Endopterygota	Hymenoptera	Apocrita	Aculeata	Apoidea	Colletidae	Colletinae	Colletes
OTU_L_35	1	EF012972	5.66809e-135	98.91	Eukaryota	Metazoa	Ecdysozoa	Arthropoda	Hexapoda	Insecta	Pterygota	Neoptera	Endopterygota	Hymenoptera	Apocrita	Aculeata	Vespoidea	Formicidae	Formicinae	Brachymyrmex
OTU_L_49	1	AF483385	1.58713e-130	97.83	Eukaryota	Metazoa	Ecdysozoa	Arthropoda	Hexapoda	Collembola	Collembola	Entomobryomorpha	Entomobryoidea	Entomobryidae	Orchesellinae	Orchesella
OTU_L_55	3	AF483396	7.54259e-114	94.18	Eukaryota	Metazoa	Ecdysozoa	Arthropoda	Hexapoda	Collembola	Collembola	Entomobryomorpha	Entomobryoidea	Entomobryidae	Entomobryinae	Sinella
OTU_L_19	5	KC832958	3.41131e-132	98.19	Eukaryota	Alveolata	Ciliophora	Intramacronucleata	Nassophorea	Microthoracida	Microthoracidae	Leptopharynx
OTU_L_7	38	AJ584697	3.03792e-33	77.26	Eukaryota	Amoebozoa	Mycetozoa	Myxogastria	Myxogastromycetidae	Physariida	Physaraceae	Fuligo
OTU_L_9	23	DQ340388	1.30759e-86	88.49	Eukaryota	Amoebozoa	Mycetozoa	Dictyosteliida	Polysphondylium
OTU_L_30	3	KM116463	6.13976e-80	86.96	Eukaryota	Viridiplantae	Chlorophyta	Trebouxiophyceae	Chlorellales	Chlorellaceae	Chloroidium
OTU_L_62	1	DQ646479	1.56483e-140	100	Eukaryota	Viridiplantae	Streptophyta	Embryophyta	Tracheophyta	Spermatophyta	Magnoliophyta	eudicotyledons	Gunneridae	Pentapetalae	asterids	Ericales	Sarraceniaceae	Sarracenia
OTU_L_51	1	NR_076660	1.76481e-55	81.91	Bacteria	Bacteroidetes	Sphingobacteriia	Sphingobacteriales	Sphingobacteriaceae	Pedobacter
OTU_L_69	2	NR_076660	1.03984e-67	84.17	Bacteria	Bacteroidetes	Sphingobacteriia	Sphingobacteriales	Sphingobacteriaceae	Pedobacter
OTU_L_81	1	NR_076660	4.87225e-61	82.8	Bacteria	Bacteroidetes	Sphingobacteriia	Sphingobacteriales	Sphingobacteriaceae	Pedobacter
OTU_L_5	58	NO BLAST MATCH WITH THESE SEARCH PARAMETERS
OTU_L_6	26	NO BLAST MATCH WITH THESE SEARCH PARAMETERS
OTU_L_57	2	NO BLAST MATCH WITH THESE SEARCH PARAMETERS
OTU_L_60	1	NO BLAST MATCH WITH THESE SEARCH PARAMETERS
OTU_L_66	1	NO BLAST MATCH WITH THESE SEARCH PARAMETERS

## Sheet: T
OTU	Sequences	GenBank_identifier	E-value	Percent_Identity	Taxonomy
OTU_T_7	5	KP143685	1.48262e-140	100	Eukaryota	Fungi	Dikarya	Ascomycota	Pezizomycotina	Dothideomycetes	Dothideomycetidae	Capnodiales	Cladosporiaceae	Cladosporium
OTU_T_29	1	KJ869217	5.52447e-115	95.15	Eukaryota	Fungi	Dikarya	Ascomycota	Pezizomycotina	Dothideomycetes	Dothideomycetidae	Capnodiales	Cladosporiaceae	Toxicocladosporium
OTU_T_6	63	JX863917	6.89798e-139	99.64	Eukaryota	Fungi	Dikarya	Ascomycota	Pezizomycotina	Eurotiomycetes	Eurotiomycetidae	Eurotiales	Aspergillaceae	Aspergillus
OTU_T_8	4	KF614894	6.89798e-139	99.64	Eukaryota	Fungi	Dikarya	Ascomycota	Pezizomycotina	Eurotiomycetes	Chaetothyriomycetidae	Chaetothyriales	unclassified Chaetothyriales
OTU_T_9	10	KM099503	1.48262e-140	100	Eukaryota	Fungi	Dikarya	Ascomycota	Pezizomycotina	Eurotiomycetes	Eurotiomycetidae	Eurotiales	Aspergillaceae	Penicillium
OTU_T_15	3	KM012005	1.48262e-140	100	Eukaryota	Fungi	Dikarya	Ascomycota	Pezizomycotina	Eurotiomycetes	Eurotiomycetidae	Eurotiales	Trichocomaceae	Talaromyces
OTU_T_22	4	EF413604	5.44685e-125	96.73	Eukaryota	Fungi	Dikarya	Ascomycota	Pezizomycotina	Eurotiomycetes	Chaetothyriomycetidae	Chaetothyriales	Herpotrichiellaceae	Capronia
OTU_T_64	2	JX863917	4.24057e-121	96.36	Eukaryota	Fungi	Dikarya	Ascomycota	Pezizomycotina	Eurotiomycetes	Eurotiomycetidae	Eurotiales	Aspergillaceae	Aspergillus
OTU_T_23	4	JN938867	2.53417e-123	97.03	Eukaryota	Fungi	Dikarya	Ascomycota	Pezizomycotina	Sordariomycetes	Hypocreomycetidae	Hypocreales	Stachybotriaceae	Stachybotrys
OTU_T_35	8	GU055527	1.50375e-130	98.18	Eukaryota	Fungi	Dikarya	Ascomycota	Pezizomycotina	Sordariomycetes	Hypocreomycetidae	Hypocreales	environmental samples
OTU_T_38	1	KP122800	2.48096e-138	99.64	Eukaryota	Fungi	Dikarya	Ascomycota	Pezizomycotina	Sordariomycetes	Hypocreomycetidae	Hypocreales	Nectriaceae	Fusarium	Fusarium fujikuroi species complex
OTU_T_46	1	KP306939	2.48116e-138	99.64	Eukaryota	Fungi	Dikarya	Ascomycota	Pezizomycotina	Sordariomycetes	Xylariomycetidae	Xylariales	Amphisphaeriaceae	Pestalotiopsis
OTU_T_59	1	AB566331	3.20959e-137	99.27	Eukaryota	Fungi	Dikarya	Ascomycota	Pezizomycotina	Sordariomycetes	Sordariomycetidae	Calosphaeriales	Calosphaeriaceae	Phaeoacremonium
OTU_T_58	1	DQ248313	4.18134e-131	97.83	Eukaryota	Fungi	Dikarya	Ascomycota	Pezizomycotina	Xylonomycetes	Xylonomycetales	Xylonomycetales incertae sedis	Symbiotaphrina
OTU_T_1	338	KM246049	2.48096e-138	99.64	Eukaryota	Fungi	Dikarya	Ascomycota	Saccharomycotina	Saccharomycetes	Saccharomycetales	Debaryomycetaceae	Candida glaebosa clade
OTU_T_18	1	KM246049	5.40845e-130	98.18	Eukaryota	Fungi	Dikarya	Ascomycota	Saccharomycotina	Saccharomycetes	Saccharomycetales	Debaryomycetaceae	Candida glaebosa clade
OTU_T_20	22	KM246049	1.94523e-129	98.16	Eukaryota	Fungi	Dikarya	Ascomycota	Saccharomycotina	Saccharomycetes	Saccharomycetales	Debaryomycetaceae	Candida glaebosa clade
OTU_T_39	1	KF830184	1.95904e-124	96.39	Eukaryota	Fungi	Dikarya	Ascomycota	Saccharomycotina	Saccharomycetes	Saccharomycetales	Debaryomycetaceae	Candida/Lodderomyces clade	Candida
OTU_T_55	1	KM246049	1.51455e-125	97.1	Eukaryota	Fungi	Dikarya	Ascomycota	Saccharomycotina	Saccharomycetes	Saccharomycetales	Debaryomycetaceae	Candida glaebosa clade
OTU_T_32	9	HG421418	2.49857e-133	98.55	Eukaryota	Fungi	Dikarya	Ascomycota	Saccharomycotina	Saccharomycetes	Saccharomycetales	Metschnikowiaceae	Metschnikowia
OTU_T_30	2	AY293189	2.48096e-138	99.64	Eukaryota	Fungi	Dikarya	Basidiomycota	Agaricomycotina	Agaricomycetes	Agaricomycetidae	Agaricales	Lyophyllaceae	Hypsizygus
OTU_T_33	1	KP012950	1.17072e-126	97.09	Eukaryota	Fungi	Dikarya	Basidiomycota	Agaricomycotina	Agaricomycetes	Polyporales	Leiotrametes
OTU_T_56	1	AF347104	1.53614e-115	94.55	Eukaryota	Fungi	Dikarya	Basidiomycota	Agaricomycotina	Agaricomycetes	Polyporales	Polyporaceae	Trichaptum
OTU_T_60	1	AF518636	6.89855e-139	99.64	Eukaryota	Fungi	Dikarya	Basidiomycota	Agaricomycotina	Agaricomycetes	Hymenochaetales	Hymenochaetaceae	Fuscoporia
OTU_T_31	1	JN043592	9.17922e-118	94.95	Eukaryota	Fungi	Dikarya	Basidiomycota	Agaricomycotina	Tremellomycetes	Tremellales	Tremellaceae	Biatoropsis
OTU_T_36	6	AY562140	2.49857e-133	98.55	Eukaryota	Fungi	Dikarya	Basidiomycota	Agaricomycotina	Tremellomycetes	Tremellales	Tremellales incertae sedis	Cryptococcus
OTU_T_54	1	AY562140	1.9592e-124	96.73	Eukaryota	Fungi	Dikarya	Basidiomycota	Agaricomycotina	Tremellomycetes	Tremellales	Tremellales incertae sedis	Cryptococcus
OTU_T_27	1	KM370119	6.99628e-129	97.45	Eukaryota	Fungi	Dikarya	Basidiomycota	Ustilaginomycotina	Malasseziomycetes	Malasseziales	Malasseziaceae	Malassezia
OTU_T_28	1	JN367325	1.48262e-140	100	Eukaryota	Fungi	Dikarya	Basidiomycota	Ustilaginomycotina	Ustilaginomycetes	Ustilaginales	Cintractiaceae	Ustanciosporium
OTU_T_44	2	KM555204	1.48262e-140	100	Eukaryota	Fungi	Dikarya	Basidiomycota	Ustilaginomycotina	Ustilaginomycetes	Ustilaginales	Ustilaginaceae	mitosporic Ustilaginaceae	Pseudozyma
OTU_T_53	1	JF816224	2.51652e-128	98.86	Eukaryota	Fungi	Entomophthoromycota	Entomophthoromycetes	Entomophthorales	Ancylistaceae	Conidiobolus
OTU_T_17	2	KC557252	2.70077e-78	86.69	Eukaryota	Fungi	environmental samples
OTU_T_24	14	KF566825	2.49857e-133	99.25	Eukaryota	Fungi	environmental samples
OTU_T_25	8	KF567899	2.51631e-128	97.45	Eukaryota	Fungi	environmental samples
OTU_T_41	5	KF750375	2.62564e-98	91.21	Eukaryota	Fungi	environmental samples
OTU_T_43	2	KC558160	2.49878e-133	98.55	Eukaryota	Fungi	environmental samples
OTU_T_47	1	JQ311682	1.54691e-110	93.5	Eukaryota	Fungi	environmental samples
OTU_T_57	1	FJ456973	2.13279e-64	83.75	Eukaryota	Fungi	environmental samples
OTU_T_62	1	AB520592	1.15437e-136	99.27	Eukaryota	Fungi	environmental samples
OTU_T_63	1	KF568247	1.48275e-140	100	Eukaryota	Fungi	environmental samples
OTU_T_10	7	JN206518	1.95904e-124	96.39	Eukaryota	Fungi	Fungi incertae sedis	Mucoromycotina	Mucorales	Mucorineae	Mucoraceae	Mucor
OTU_T_16	22	JN206600	1.48262e-140	100	Eukaryota	Fungi	Fungi incertae sedis	Mucoromycotina	Mucorales	Cunninghamellaceae	Cunninghamella
OTU_T_19	10	KF733344	9.05026e-128	98.49	Eukaryota	Fungi	Fungi incertae sedis	Mucoromycotina	Mucorales	Mucorineae	Mucoraceae	Mucor
OTU_T_49	21	KM056329	5.37033e-135	98.91	Eukaryota	Fungi	Fungi incertae sedis	Mucoromycotina	Mucorales	Mucorineae	Mucoraceae	Mucor
OTU_T_4	119	KF436392	5.37033e-135	98.91	Eukaryota	Fungi
OTU_T_40	1	KF435295	1.48262e-140	100	Eukaryota	Fungi
OTU_T_2	77	JQ000370	1.52518e-120	95.64	Eukaryota	Metazoa	Ecdysozoa	Arthropoda	Chelicerata	Arachnida	Acari	Acariformes	Sarcoptiformes	Astigmata	Histiostomatoidea	Histiostomatidae	Anoetus
OTU_T_5	72	JQ000359	1.94523e-129	97.45	Eukaryota	Metazoa	Ecdysozoa	Arthropoda	Chelicerata	Arachnida	Acari	Acariformes	Sarcoptiformes	Astigmata	Histiostomatoidea	Histiostomatidae	Ovanoetus
OTU_T_42	10	JQ000368	7.14694e-114	93.84	Eukaryota	Metazoa	Ecdysozoa	Arthropoda	Chelicerata	Arachnida	Acari	Acariformes	Sarcoptiformes	Astigmata	Histiostomatoidea	Histiostomatidae	Sellea
OTU_T_61	5	JQ000370	1.19594e-111	93.84	Eukaryota	Metazoa	Ecdysozoa	Arthropoda	Chelicerata	Arachnida	Acari	Acariformes	Sarcoptiformes	Astigmata	Histiostomatoidea	Histiostomatidae	Anoetus
OTU_T_11	15	KJ860019	5.33247e-140	100	Eukaryota	Metazoa	Ecdysozoa	Arthropoda	Hexapoda	Insecta	Pterygota	Neoptera	Endopterygota	Hymenoptera	Apocrita	Aculeata	Vespoidea	Formicidae	Myrmicinae	Stenamma
OTU_T_50	2	GU244889	3.25532e-127	97.43	Eukaryota	Metazoa	Ecdysozoa	Arthropoda	Hexapoda	Insecta	Pterygota	Neoptera	Endopterygota	Hymenoptera	Apocrita	Aculeata	Apoidea	Apidae	Neolarrini	Neolarra
OTU_T_13	2	DQ145650	7.72469e-59	83.65	Eukaryota	Metazoa	Ecdysozoa	Nematoda
OTU_T_45	1	JX839924	1.48275e-140	100	Eukaryota	Metazoa	Lophotrochozoa	Mollusca	Gastropoda	Heterobranchia	Euthyneura	Panpulmonata	Eupulmonata	Stylommatophora	Sigmurethra	Polygyroidea	Polygyridae	Neohelix
OTU_T_3	93	AJ584697	2.87833e-33	77.26	Eukaryota	Amoebozoa	Mycetozoa	Myxogastria	Myxogastromycetidae	Physariida	Physaraceae	Fuligo
OTU_T_26	3	AJ584697	2.89876e-28	76.56	Eukaryota	Amoebozoa	Mycetozoa	Myxogastria	Myxogastromycetidae	Physariida	Physaraceae	Fuligo
OTU_T_34	3	AJ584697	2.25679e-24	81.7	Eukaryota	Amoebozoa	Mycetozoa	Myxogastria	Myxogastromycetidae	Physariida	Physaraceae	Fuligo
OTU_T_66	1	DQ340388	3.44459e-87	88.49	Eukaryota	Amoebozoa	Mycetozoa	Dictyosteliida	Polysphondylium
OTU_T_51	1	KM116463	2.68196e-83	87.68	Eukaryota	Viridiplantae	Chlorophyta	Trebouxiophyceae	Chlorellales	Chlorellaceae	Chloroidium
OTU_T_52	1	JQ519384	6.89855e-139	99.64	Eukaryota	Viridiplantae	Streptophyta	Embryophyta	Tracheophyta	Spermatophyta	Magnoliophyta	eudicotyledons	Gunneridae	Pentapetalae	asterids	Ericales	Sarraceniaceae	Sarracenia
OTU_T_21	1	CP011650	3.20932e-137	99.28	Bacteria	Proteobacteria	Gammaproteobacteria	Enterobacteriales	Enterobacteriaceae	Enterobacter	Enterobacter cloacae complex
OTU_T_37	3	CP003488	4.7825e-36	87.41	Bacteria	Proteobacteria	Gammaproteobacteria	Enterobacteriales	Enterobacteriaceae	Providencia
OTU_T_65	1	NR_076660	2.163e-54	81.63	Bacteria	Bacteroidetes	Sphingobacteriia	Sphingobacteriales	Sphingobacteriaceae	Pedobacter
OTU_T_12	5	NO BLAST MATCH WITH THESE SEARCH PARAMETERS
OTU_T_14	7	NO BLAST MATCH WITH THESE SEARCH PARAMETERS
OTU_T_48	2	NO BLAST MATCH WITH THESE SEARCH PARAMETERS

## Sheet: Global
Taxa	OTU	Sequences	GenBank_identifier	E-value	Percent_Identity	Taxonomy
Fungi1	OTU_12	52	KP143685	1.48262e-140	100	Eukaryota	Fungi	Dikarya	Ascomycota	Pezizomycotina	Dothideomycetes	Dothideomycetidae	Capnodiales	Cladosporiaceae	Cladosporium
Fungi2	OTU_17	51	KP122800	1.48262e-140	100	Eukaryota	Fungi	Dikarya	Ascomycota	Pezizomycotina	Sordariomycetes	Hypocreomycetidae	Hypocreales	Nectriaceae	Fusarium	Fusarium fujikuroi species complex
Fungi3	OTU_43	22	KM246064	2.48116e-138	99.64	Eukaryota	Fungi	Dikarya	Ascomycota	Pezizomycotina	Dothideomycetes	Pleosporomycetidae	Pleosporales	Pleosporineae	Pleosporaceae	Curvularia
Fungi4	OTU_1	2507	KM246049	2.48096e-138	99.64	Eukaryota	Fungi	Dikarya	Ascomycota	Saccharomycotina	Saccharomycetes	Saccharomycetales	Debaryomycetaceae	Candida glaebosa clade
Fungi5	OTU_48	97	KM246049	8.9872e-133	98.55	Eukaryota	Fungi	Dikarya	Ascomycota	Saccharomycotina	Saccharomycetes	Saccharomycetales	Debaryomycetaceae	Candida glaebosa clade
Fungi6	OTU_67	168	KM246049	5.4089e-130	98.18	Eukaryota	Fungi	Dikarya	Ascomycota	Saccharomycotina	Saccharomycetes	Saccharomycetales	Debaryomycetaceae	Candida glaebosa clade
Fungi7	OTU_121	84	KM246049	5.4089e-130	98.52	Eukaryota	Fungi	Dikarya	Ascomycota	Saccharomycotina	Saccharomycetes	Saccharomycetales	Debaryomycetaceae	Candida glaebosa clade
Fungi8	OTU_164	57	KF830174	1.54691e-110	93.48	Eukaryota	Fungi	Dikarya	Ascomycota	Saccharomycotina	Saccharomycetes	Saccharomycetales	mitosporic Saccharomycetales	Candida
Fungi9	OTU_188	30	KM246049	1.50375e-130	98.18	Eukaryota	Fungi	Dikarya	Ascomycota	Saccharomycotina	Saccharomycetes	Saccharomycetales	Debaryomycetaceae	Candida glaebosa clade
Fungi10	OTU_300	54	KM246049	5.4089e-130	98.18	Eukaryota	Fungi	Dikarya	Ascomycota	Saccharomycotina	Saccharomycetes	Saccharomycetales	Debaryomycetaceae	Candida glaebosa clade
Fungi11	OTU_10	189	KM056329	1.48275e-140	100	Eukaryota	Fungi	Fungi incertae sedis	Mucoromycotina	Mucorales	Mucorineae	Mucoraceae	Mucor
Fungi12	OTU_147	14	KF567809	1.15428e-136	99.27	Eukaryota	Fungi	environmental samples
Fungi13	OTU_241	40	KF750375	5.60319e-105	92.36	Eukaryota	Fungi	environmental samples
Fungi14	OTU_4	766	KF436392	5.37033e-135	98.91	Eukaryota	Fungi
Fungi15	OTU_25	15	KP192855	1.48262e-140	100	Eukaryota	Fungi	Dikarya	Ascomycota	Pezizomycotina	Sordariomycetes	Sordariomycetes incertae sedis	Trichosphaeriales	Trichosphaeriaceae	Nigrospora
Amoebozoa1	OTU_5	227	AJ584697	2.87833e-33	77.26	Eukaryota	Amoebozoa	Mycetozoa	Myxogastria	Myxogastromycetidae	Physariida	Physaraceae	Fuligo
Alveolata1	OTU_35	18	KC832958	6.94753e-134	98.55	Eukaryota	Alveolata	Ciliophora	Intramacronucleata	Nassophorea	Microthoracida	Microthoracidae	Leptopharynx
Nematoda1	OTU_7	79	DQ145650	7.72533e-59	83.65	Eukaryota	Metazoa	Ecdysozoa	Nematoda
Nematoda2	OTU_159	154	DQ145650	6.01395e-55	82.89	Eukaryota	Metazoa	Ecdysozoa	Nematoda
Nematoda3	OTU_291	21	DQ145650	1.29272e-56	83.21	Eukaryota	Metazoa	Ecdysozoa	Nematoda
Insect1	OTU_8	61	EF012972	1.48275e-140	100	Eukaryota	Metazoa	Ecdysozoa	Arthropoda	Hexapoda	Insecta	Pterygota	Neoptera	Endopterygota	Hymenoptera	Apocrita	Aculeata	Vespoidea	Formicidae	Formicinae	Brachymyrmex
Insect2	OTU_13	37	EF013063	1.48262e-140	100	Eukaryota	Metazoa	Ecdysozoa	Arthropoda	Hexapoda	Insecta	Pterygota	Neoptera	Endopterygota	Hymenoptera	Apocrita	Aculeata	Vespoidea	Formicidae	Myrmicinae	Solenopsis
Insect3	OTU_263	41	EF013034	1.15428e-136	99.27	Eukaryota	Metazoa	Ecdysozoa	Arthropoda	Hexapoda	Insecta	Pterygota	Neoptera	Endopterygota	Hymenoptera	Apocrita	Aculeata	Vespoidea	Formicidae	Formicinae	Nylanderia
Mite1	OTU_3	828	JQ000359	1.94523e-129	97.45	Eukaryota	Metazoa	Ecdysozoa	Arthropoda	Chelicerata	Arachnida	Acari	Acariformes	Sarcoptiformes	Astigmata	Histiostomatoidea	Histiostomatidae	Ovanoetus
Mite2	OTU_76	30	JQ000359	3.27843e-122	96.01	Eukaryota	Metazoa	Ecdysozoa	Arthropoda	Chelicerata	Arachnida	Acari	Acariformes	Sarcoptiformes	Astigmata	Histiostomatoidea	Histiostomatidae	Ovanoetus
Mite3	OTU_2	1071	JQ000370	1.52518e-120	95.64	Eukaryota	Metazoa	Ecdysozoa	Arthropoda	Chelicerata	Arachnida	Acari	Acariformes	Sarcoptiformes	Astigmata	Histiostomatoidea	Histiostomatidae	Anoetus
Mite4	OTU_105	56	JQ000370	3.32515e-112	94.44	Eukaryota	Metazoa	Ecdysozoa	Arthropoda	Chelicerata	Arachnida	Acari	Acariformes	Sarcoptiformes	Astigmata	Histiostomatoidea	Histiostomatidae	Anoetus
Mite5	OTU_153	34	JQ000370	1.53601e-115	95.2	Eukaryota	Metazoa	Ecdysozoa	Arthropoda	Chelicerata	Arachnida	Acari	Acariformes	Sarcoptiformes	Astigmata	Histiostomatoidea	Histiostomatidae	Anoetus
Mite6	OTU_202	50	JQ000370	5.52492e-115	95.49	Eukaryota	Metazoa	Ecdysozoa	Arthropoda	Chelicerata	Arachnida	Acari	Acariformes	Sarcoptiformes	Astigmata	Histiostomatoidea	Histiostomatidae	Anoetus
Mite7	OTU_323	45	JQ000370	1.19594e-111	93.84	Eukaryota	Metazoa	Ecdysozoa	Arthropoda	Chelicerata	Arachnida	Acari	Acariformes	Sarcoptiformes	Astigmata	Histiostomatoidea	Histiostomatidae	Anoetus
Unknown	OTU_9	66	NO BLAST MATCH WITH THESE SEARCH PARAMETERS
